# Supplementary material for: Coupled equilibria of dimerization and lipid binding modulate SARS Cov 2 Orf9b interactions and interferon response
Source: eLife journal article supplement (doi:10.7554/elife.106484), 2025-05-07
Supplement: fig5-figsupp1-data2 [file fig 5 sup 1 source data 2.pdf › fig 5 sup 1 source data 2.pdf]

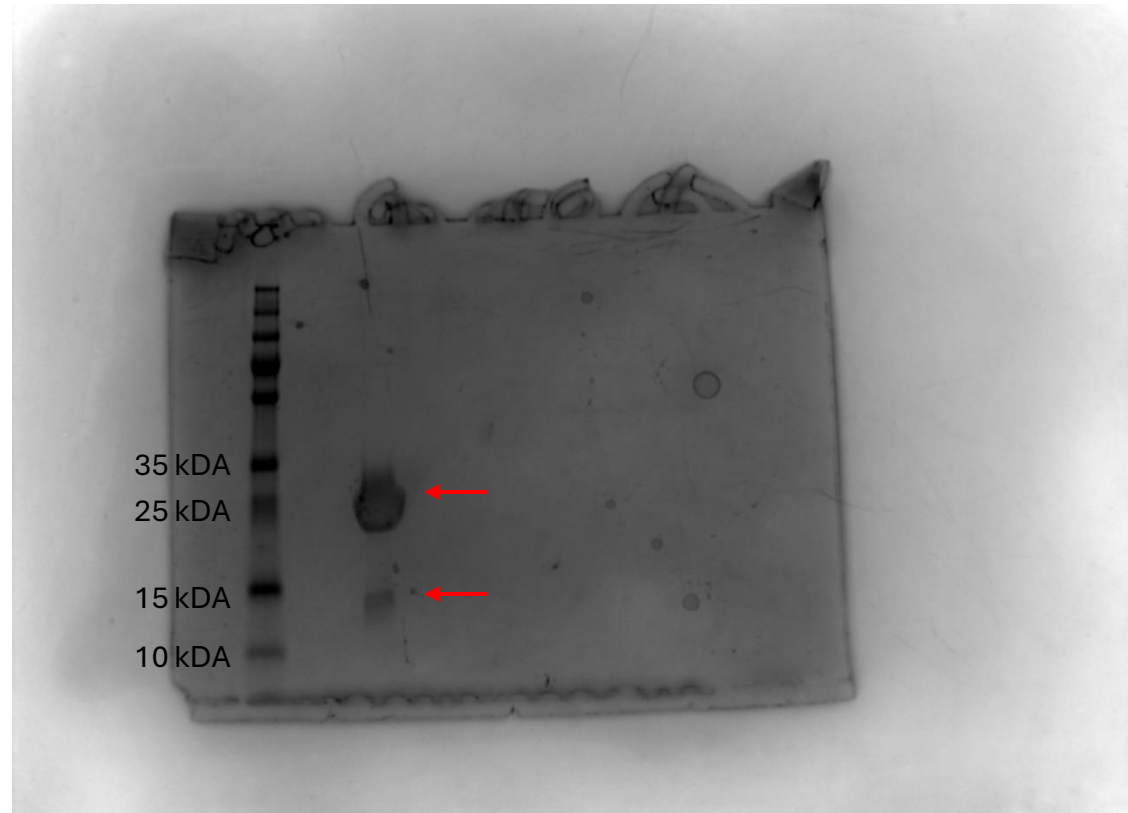

**Figure 5 Supplemental 1 Source Data 2.** Original SDS-PAGE corresponding to Figure 5 Supplemental 1 panel B. Red arrows indicate the bands corresponding to the Orf9b homodimer fusion product (top band) and the monomeric degradation product (lower band). Molecular weights are listed based on the protein ladder.
