# Supplementary material for: Coupled equilibria of dimerization and lipid binding modulate SARS Cov 2 Orf9b interactions and interferon response
Source: eLife. 2025 Sep 17;14:RP106484. doi: 10.7554/eLife.106484 (PMC12443476; doi:10.7554/eLife.106484)
Supplement: Supplementary file 1. [file elife-106484-supp1.xlsx]

## Sheet: Sheet1
	Refolded Orf9b Homodimer				Native Orf9b Homodimer
	Space group	P32 2 1			Space group	P212121
	Unit-cell dimensions				Unit-cell dimensions
	a, b, c (Å)	75.28, 75.28, 80.21			a, b, c (Å)	35.85, 64.23, 73.57
	ɑ,β,γ (o)	90, 90, 120			ɑ,β,γ (o)	90, 90, 90
	Wavelength (Å)	1.116			Wavelength (Å)	1.116
	Resolution (Å)	37.64-2.799 (2.91-2.8)			Resolution (Å)	48.38-1.653 (1.68-1.65)
	Total reflections	61122 (4488)			Total reflections	130235 (4108)
	Unique reflections	12518 (1367)			Unique reflections	38516 (1312)
	Multiplicity	4.9 (3.3)			Multiplicity	3.4 (3.1)
	Rmerge	0.06155 (1.187)			Rmerge	0.07945 (1.435)
	Rmeas	0.06893 (1.414)			Rmeas	0.09461 (1.71)
	Rpim	0.03073 (0.7572)			Rpim	0.05076 (0.9201)
	CC1/2	0.998 (0.319)			CC1/2	0.995 (0.228)
	CC*	0.999 (0.696)			CC*	0.999 (0.609)
	<I/σ(I)>	11.49 (0.93)			<I/σ(I)>	7.22 (0.92)
	Completeness (%)	99.66 (98.6)			Completeness (%)	98.06 (85.11)
	Wilson B-factor	97.42			Wilson B-factor	27.18
	Refinement reflections	6774 (723)			Refinement reflections	20788 (689)
	Reflections used for Rfree (Å)	682 (72)			Reflections used for Rfree (Å)	2000 (66)
	Rwork	0.2921 (0.4324)			Rwork	0.1944 (0.3579)
	Rfree	0.3358 (0.467)			Rfree	0.228 (0.3565)
	No. of non-hydrogen atoms	1174			No. of non-hydrogen atoms	1400
	Macromolecules	1173			Macromolecules	1338
	Ligands	0			Ligands	12
	Solvent	1			Solvent	50
	Protein residues	152			Protein residues	168
	RMS (bonds)	0.004			RMS (bonds)	0.004
	RMS (angles)	0.73			RMS (angles)	0.8
	Ramachandran favored (%)	91.18			Ramachandran favored (%)	98.12
	Ramachandran allowed (%)	8.82			Ramachandran allowed (%)	1.25
	Ramachandran outliers (%)	0			Ramachandran outliers (%)	0.62
	Rotamer outliers (%)	0.75			Rotamer outliers (%)	0
	Clashscore	18.9			Clashscore	4.99
	Average B-factor	114.76			Average B-factor	45.43
	Macromolecules	114.77			Macromolecules	45.5
	Solvent	98.87			Solvent	41.43
